# Supplementary material for: Diagnostic Value of Superb Microvascular Imaging in Differentiating Benign and Malignant Breast Tumors: A Systematic Review and Meta-Analysis
Source: Diagnostics (Basel). 2022 Oct 31;12(11):2648. doi: 10.3390/diagnostics12112648 (PMC9689350; doi:10.3390/diagnostics12112648)
Supplement: Supplementary file 1 [file diagnostics-12-02648-s001.zip › Search strategy.txt]

维普
疾病类型：乳腺肿瘤（乳房肿瘤，乳腺结节，乳腺癌，breast tumor，breast neoplasms，breast neoplasm，mammary tumors)
干预措施：超微血管成像技术（超微血管显像技术，超微血管显像，超微血管成像）
研究方法：诊断试验
检索策略：((题名/关键词=乳腺+乳腺肿瘤+乳腺癌+乳腺结节+乳房肿瘤+breast tumor+breast neoplasms+breast neoplasm+mammary tumors)*(题名/关键词=超微血管成像技术+超微血管显像技术+超微血管显像+超微血管成像))*(年份=2010-2022)


知网
疾病类型：乳腺肿瘤（乳房肿瘤，乳腺结节，乳腺癌，breast tumor，breast neoplasms，breast neoplasm，mammary tumors)
干预措施：超微血管成像技术（超微血管显像技术，超微血管显像，超微血管成像）
研究方法：诊断试验
检索策略：主题 = 乳腺)+乳腺肿瘤)+乳腺癌)+乳腺结节)+乳房肿瘤)+中英文扩展(breast tumor)+中英文扩展(breast neoplasms)+中英文扩展(breast neoplasm)+中英文扩展(mammary tumors ) AND 主题 = 超微血管成像技术+超微血管显像技术+超微血管显像+超微血管成像 AND 主题 = 诊断+评估 or ( 题名 = 乳腺)+乳腺肿瘤)+乳腺癌)+乳腺结节)+乳房肿瘤)+中英文扩展(breast tumor)+中英文扩展(breast neoplasms)+中英文扩展(breast neoplasm)+中英文扩展(mammary tumors ) or 题名 = 超微血管成像技术+超微血管显像技术+超微血管显像+超微血管成像 or 题名 = 诊断+评估 ) AND 发表时间 Between (2010-01-01,2022-03-07 ) (模糊匹配)。
  


万方
疾病类型：乳腺肿瘤（乳房肿瘤，乳腺结节，乳腺癌，breast tumor，breast neoplasms，breast neoplasm，mammary tumors)
干预措施：超微血管成像技术（超微血管显像技术，超微血管显像，超微血管成像）
研究方法：诊断试验
检索策略： (主题:(乳腺 or 乳腺肿瘤 or 乳腺癌 or 乳腺结节 or 乳房肿瘤 or breast tumor or breast neoplasms or breast neoplasm or mammary tumors) and 主题:(超微血管成像技术 or 超微血管显像技术 or 超微血管显像 or 超微血管成像) and 主题:(诊断 or 评估)) and Date:2010-*


CBM
疾病类型：乳腺肿瘤（乳房肿瘤，乳腺结节，乳腺癌，breast tumor，breast neoplasms，breast neoplasm，mammary tumors)
干预措施：超微血管成像技术（超微血管显像技术，超微血管显像，超微血管成像）
研究方法：诊断试验
检索策略： 详见文件

Pubmed（主题词＋自由词）
疾病类型：Breast Neoplasms (Breast Neoplasm
Neoplasm, Breast
Breast Tumors
Breast Tumor
Tumor, Breast
Tumors, Breast
Neoplasms, Breast
Breast Cancer
Cancer, Breast
Mammary Cancer
Cancer, Mammary
Cancers, Mammary
Mammary Cancers
Malignant Neoplasm of Breast
Breast Malignant Neoplasm
Breast Malignant Neoplasms
Malignant Tumor of Breast
Breast Malignant Tumor
Breast Malignant Tumors
Cancer of Breast
Cancer of the Breast
Mammary Carcinoma, Human
Carcinoma, Human Mammary
Carcinomas, Human Mammary
Human Mammary Carcinomas
Mammary Carcinomas, Human
Human Mammary Carcinoma
Mammary Neoplasms, Human
Human Mammary Neoplasm
Human Mammary Neoplasms
Neoplasm, Human Mammary
Neoplasms, Human Mammary
Mammary Neoplasm, Human
Breast Carcinoma
Breast Carcinomas
Carcinoma, Breast
Carcinomas, Breast)
干预措施：superb microvascular imaging（SMI）
研究方法：sensitiv*[Title/Abstract] OR
sensitivity and specificity[MeSH Terms] OR
(predictive[Title/Abstract] AND value*[Title/Abstract]) OR
predictive value of tests[MeSH Term] OR
accuracy*[Title/Abstract]
检索策略：  (((((((((((((((((((((((((((((((((((((((Neoplasm, Breast[Title/Abstract]) OR ((Breast Neoplasm[Title/Abstract])) OR (Breast Tumors[Title/Abstract])) OR (Breast Tumor[Title/Abstract])) OR (Tumor, Breast[Title/Abstract])) OR (Tumors, Breast[Title/Abstract])) OR (Neoplasms, Breast[Title/Abstract])) OR (Breast Cancer[Title/Abstract])) OR (Cancer, Breast[Title/Abstract])) OR (Mammary Cancer[Title/Abstract])) OR (Cancer, Mammary[Title/Abstract])) OR (Cancers, Mammary[Title/Abstract])) OR (Mammary Cancers[Title/Abstract])) OR (Malignant Neoplasm of Breast[Title/Abstract])) OR (Breast Malignant Neoplasm[Title/Abstract])) OR (Breast Malignant Neoplasms[Title/Abstract])) OR (Malignant Tumor of Breast[Title/Abstract])) OR (Breast Malignant Tumor[Title/Abstract])) OR (Breast Malignant Tumors[Title/Abstract])) OR (Cancer of Breast[Title/Abstract])) OR (Cancer of the Breast[Title/Abstract])) OR (Mammary Carcinoma, Human[Title/Abstract])) OR (Carcinoma, Human Mammary[Title/Abstract])) OR (Carcinomas, Human Mammary[Title/Abstract])) OR (Human Mammary Carcinomas[Title/Abstract])) OR (Mammary Carcinomas, Human[Title/Abstract])) OR (Human Mammary Carcinoma[Title/Abstract])) OR (Mammary Neoplasms, Human[Title/Abstract])) OR (Human Mammary Neoplasm[Title/Abstract])) OR (Human Mammary Neoplasms[Title/Abstract])) OR (Neoplasm, Human Mammary[Title/Abstract])) OR (Neoplasms, Human Mammary[Title/Abstract])) OR (Mammary Neoplasm, Human[Title/Abstract])) OR (Breast Carcinoma[Title/Abstract])) OR (Breast Carcinomas[Title/Abstract])) OR (Carcinoma, Breast[Title/Abstract])) OR (Carcinomas, Breast[Title/Abstract])) OR (Breast Neoplasms[MeSH Terms])) AND ((SMI[Title/Abstract]) OR (superb microvascular imaging[Title/Abstract]))) AND (sensitiv*[Title/Abstract] OR sensitivity and specificity[MeSH Terms] OR (predictive[Title/Abstract] AND value*[Title/Abstract]) OR predictive value of tests[MeSH Term] OR accuracy*[Title/Abstract]) Filters: from 2010/1/1 - 2022/3/7


Embase（主题词＋自由词）

疾病类型：Breast cancer (Breast Neoplasm
Neoplasm, Breast
Breast Tumors
Breast Tumor
Tumor, Breast
Tumors, Breast
Neoplasms, Breast
Breast Cancer
Cancer, Breast
Mammary Cancer
Cancer, Mammary
Cancers, Mammary
Mammary Cancers
Malignant Neoplasm of Breast
Breast Malignant Neoplasm
Breast Malignant Neoplasms
Malignant Tumor of Breast
Breast Malignant Tumor
Breast Malignant Tumors
Cancer of Breast
Cancer of the Breast
Mammary Carcinoma, Human
Carcinoma, Human Mammary
Carcinomas, Human Mammary
Human Mammary Carcinomas
Mammary Carcinomas, Human
Human Mammary Carcinoma
Mammary Neoplasms, Human
Human Mammary Neoplasm
Human Mammary Neoplasms
Neoplasm, Human Mammary
Neoplasms, Human Mammary
Mammary Neoplasm, Human
Breast Carcinoma
Breast Carcinomas
Carcinoma, Breast
Carcinomas, Breast)
干预措施：superb microvascular imaging（SMI）
研究方法：'sensitiv*':ab,ti OR
'sensitivity and specificity'/exp OR
(predictive:ab,ti AND value*:ab,ti) OR
'predictive value of tests'/exp OR
'accuracy*':ab,ti
检索策略：'Breast Neoplasm':ab,ti or 'Neoplasm, Breast':ab,ti or 'Breast Tumor':ab,ti or 'Breast Tumors':ab,ti or 'Tumor, Breast':ab,ti or 'Tumors, Breast':ab,ti or 'Neoplasms, Breast':ab,ti or 'Breast Cancer':ab,ti or 'Cancer, Breast':ab,ti or 'Mammary Cancer':ab,ti or 'Cancer, Mammary':ab,ti or 'Cancers, Mammary':ab,ti or 'Mammary Cancers':ab,ti or 'Malignant Neoplasm of Breast':ab,ti or 'Breast Malignant Neoplasm':ab,ti or 'Breast Malignant Neoplasms':ab,ti or 'Malignant Tumor of Breast':ab,ti or 'Breast Malignant Tumor':ab,ti or 'Breast Malignant Tumors':ab,ti or 'Cancer of Breast':ab,ti or 'Cancer of the Breast':ab,ti or 'Mammary Carcinoma, Human':ab,ti or 'Carcinoma, Human Mammary':ab,ti or 'Carcinomas, Human Mammary':ab,ti or 'Human Mammary Carcinomas':ab,ti or 'Human Mammary Carcinoma':ab,ti or 'Mammary Carcinomas, Human':ab,ti or 'Mammary Neoplasms, Human':ab,ti or 'Human Mammary Neoplasm':ab,ti or 'Human Mammary Neoplasms':ab,ti or 'Neoplasm, Human Mammary':ab,ti or 'Neoplasms, Human Mammary':ab,ti or 'Mammary Neoplasm, Human':ab,ti or 'Breast Carcinoma':ab,ti or 'Breast Carcinomas':ab,ti or 'Carcinoma, Breast':ab,ti or 'Carcinomas, Breast':ab,ti (详见文件
)


Cochrane library（主题词＋自由词）

疾病类型：Breast cancer (Breast Neoplasm
Neoplasm, Breast
Breast Tumors
Breast Tumor
Tumor, Breast
Tumors, Breast
Neoplasms, Breast
Breast Cancer
Cancer, Breast
Mammary Cancer
Cancer, Mammary
Cancers, Mammary
Mammary Cancers
Malignant Neoplasm of Breast
Breast Malignant Neoplasm
Breast Malignant Neoplasms
Malignant Tumor of Breast
Breast Malignant Tumor
Breast Malignant Tumors
Cancer of Breast
Cancer of the Breast
Mammary Carcinoma, Human
Carcinoma, Human Mammary
Carcinomas, Human Mammary
Human Mammary Carcinomas
Mammary Carcinomas, Human
Human Mammary Carcinoma
Mammary Neoplasms, Human
Human Mammary Neoplasm
Human Mammary Neoplasms
Neoplasm, Human Mammary
Neoplasms, Human Mammary
Mammary Neoplasm, Human
Breast Carcinoma
Breast Carcinomas
Carcinoma, Breast
Carcinomas, Breast)
干预措施：superb microvascular imaging（SMI）
研究方法：'sensitiv*':ab,ti OR
'sensitivity and specificity'/exp OR
(predictive:ab,ti AND value*:ab,ti) OR
'predictive value of tests'/exp OR
'accuracy*':ab,ti
检索策略：(Breast Tumors):ti,ab,kw OR (Breast Tumor):ti,ab,kw OR (Tumor, Breast):ti,ab,kw OR (Tumors, Breast):ti,ab,kw OR (Neoplasms, Breast):ti,ab,kw OR (Breast Cancer):ti,ab,kw OR (Cancer, Breast):ti,ab,kw OR (Mammary Cancer):ti,ab,kw OR (Cancer, Mammary):ti,ab,kw OR (Cancers, Mammary):ti,ab,kw OR (Mammary Cancers):ti,ab,kw OR (Malignant Neoplasm of Breast):ti,ab,kw OR (Breast Malignant Neoplasm):ti,ab,kw OR (Breast Malignant Neoplasms):ti,ab,kw OR (Malignant Tumor of Breast):ti,ab,kw OR (Breast Malignant Tumor):ti,ab,kw OR (Breast Malignant Tumors):ti,ab,kw OR (Cancer of Breast):ti,ab,kw OR (Cancer of the Breast):ti,ab,kw OR (Mammary Carcinoma, Human):ti,ab,kw OR (Carcinoma, Human Mammary):ti,ab,kw OR (Carcinomas, Human Mammary):ti,ab,kw OR (Human Mammary Carcinomas):ti,ab,kw OR (Mammary Carcinomas, Human):ti,ab,kw OR (Human Mammary Carcinoma):ti,ab,kw OR (Mammary Neoplasms, Human):ti,ab,kw OR (Human Mammary Neoplasm):ti,ab,kw OR (Human Mammary Neoplasms):ti,ab,kw OR (Neoplasm, Human Mammary):ti,ab,kw OR (Neoplasms, Human Mammary):ti,ab,kw OR (Mammary Neoplasm, Human):ti,ab,kw OR (Breast Carcinoma):ti,ab,kw OR (Breast Carcinomas):ti,ab,kw OR (Carcinoma, Breast):ti,ab,kw OR (Carcinomas, Breast):ti,ab,kw(详见文件)


Web of science
疾病类型:Breast Neoplasms or Breast Neoplasm or Neoplasm, Breast or Breast Tumors or Breast Tumor or Tumor, Breast or Tumors, Breast or Neoplasms, Breast or Breast Cancer or Cancer, Breast or Mammary Cancer or Cancer, Mammary or Cancers, Mammary or Mammary Cancers or Malignant Neoplasm of Breast or Breast Malignant Neoplasm or Breast Malignant Neoplasms or Malignant Tumor of Breast or Breast Malignant Tumor or Breast Malignant Tumors or Cancer of Breast or Cancer of the Breast or Mammary Carcinoma, Human or Carcinoma, Human Mammary or Carcinomas, Human Mammary or Human Mammary Carcinomas or Mammary Carcinomas, Human or Human Mammary Carcinoma or Mammary Neoplasms, Human or Human Mammary Neoplasm or Human Mammary Neoplasms or Neoplasm, Human Mammary or Neoplasms, Human Mammary or Mammary Neoplasm, Human or Breast Carcinoma or Breast Carcinomas or Carcinoma, Breast or Carcinomas, Breast	
干预措施：（superb microvascular imaging or microvascular ）
研究方法：(sensitiv* or sensitivity and specificity or predictive or value* or predictive value of tests or accuracy*) 
检索策略：https://www.webofscience.com/wos/alldb/summary/6bf8cfa4-679f-4e08-b9d8-02f49856cc7d-2ae59a34/relevance/1		
